# Supplementary material
Source: ML conference proceedings conference paper supplement (https://proceedings.mlr.press/v97/park19c.html)
Supplement: Supplementary file 1 [file park19c-supp.pdf]

# Supplementary Material:

## Spectral Approximate Inference

### A. Proof of Claim 1

We first prove  $\mathbf{f}(\Omega) \subset \mathcal{B}$ . To this end we introduce the following inequalities for all  $\mathbf{x} \in \{-1, 1\}^n$ :

$$|\langle \mathbf{u}_j, \mathbf{x} \rangle| \leq \|\mathbf{u}_j\|_1, \quad |\langle \mathbf{u}_j, \mathbf{x} \rangle - c \cdot f_j(\mathbf{x})| \leq c \cdot \frac{n+1}{2} \quad (17)$$

which directly leads us to  $|c \cdot f_j(\mathbf{x})| \leq \|\mathbf{u}_j\|_1 + c \cdot (n+1)/2 \leq c \cdot b_j$ , and therefore  $\mathbf{f}(\Omega) \subset \mathcal{B}$ . Here, the first inequality of (17) is trivial. The second inequality of (17) is from the fact that the error between  $c \cdot f_j(\mathbf{x})$  and  $\langle \mathbf{u}_j, \mathbf{x} \rangle$  arises from a series of quantizations which is presented once in (8) and at most  $n$  times in (9). Since the quantization error is at most  $c/2$  for each quantization, the second inequality of (17) holds.

Now we prove the bound of  $|\mathcal{B}|$ . From the definition of  $\mathcal{B}$  and  $b_j$ , one can easily observe that the following bound on  $|\mathcal{B}|$  holds:

$$\begin{aligned} |\mathcal{B}| &= \prod_{j=1}^r (2b_j + 1) = 2^r \prod_{j=1}^r \left( \frac{1}{c} \|\mathbf{u}_j\|_1 + \frac{n}{2} + 1 \right) \\ &= 2^r \prod_{j=1}^r \left( \frac{1}{c} \sqrt{|\lambda_j|} \|\mathbf{v}_j\|_1 + \frac{n}{2} + 1 \right) \\ &\leq 2^r \prod_{j=1}^r \left( \frac{1}{c} \sqrt{|\lambda_j|} n + \frac{n}{2} + 1 \right), \end{aligned}$$

where the inequality is from  $\|\mathbf{v}_j\|_1 \leq \sqrt{n} \|\mathbf{v}_j\|_2 = \sqrt{n}$ .

### B. Proof of Claim 2

Claim 2 holds since

$$\begin{aligned} t_i(\mathbf{k}) &= t_{i-1}(\mathbf{k}) + \sum_{\mathbf{x} \in \mathbf{f}^{-1}(\mathbf{k}) \cap (\mathcal{S}_i \setminus \mathcal{S}_{i-1})} \exp(\langle \boldsymbol{\theta}, \mathbf{x} \rangle) \\ &= t_{i-1}(\mathbf{k}) + \sum_{\mathbf{g}_i(\mathbf{x}) \in \mathbf{g}_i(\mathbf{f}^{-1}(\mathbf{k}) \cap (\mathcal{S}_i \setminus \mathcal{S}_{i-1}))} \exp(\langle \boldsymbol{\theta}, \mathbf{x} \rangle) \\ &= t_{i-1}(\mathbf{k}) + \sum_{\mathbf{x}' \in \mathbf{f}^{-1}(\mathbf{k} - [\hat{u}_{ji}]_{j=1}^r) \cap \mathcal{S}_{i-1}} \exp(\langle \boldsymbol{\theta}, \mathbf{g}_i^{-1}(\mathbf{x}') \rangle) \\ &= t_{i-1}(\mathbf{k}) + \sum_{\mathbf{x}' \in \mathbf{f}^{-1}(\mathbf{k} - [\hat{u}_{ji}]_{j=1}^r) \cap \mathcal{S}_{i-1}} \exp(2\theta_i + \langle \boldsymbol{\theta}, \mathbf{x}' \rangle) \\ &= t_{i-1}(\mathbf{k}) + \exp(2\theta_i) \cdot t_{i-1}(\mathbf{k} - [\hat{u}_{ji}]_{j=1}^r). \end{aligned} \quad (18)$$

In the above,  $\mathbf{g}_i : \mathcal{S}_i \setminus \mathcal{S}_{i-1} \rightarrow \mathcal{S}_{i-1}$  is a bijection defined by  $\mathbf{g}_i(\mathbf{x}) = \mathbf{x}'$  such that  $x'_\ell = x_\ell$  except for  $\ell = i$ . The second equality of (18) is from replacing the summation over  $\mathbf{f}^{-1}(\mathbf{k}) \cap (\mathcal{S}_i \setminus \mathcal{S}_{i-1})$  by that over  $\mathbf{g}_i(\mathbf{f}^{-1}(\mathbf{k}) \cap (\mathcal{S}_i \setminus \mathcal{S}_{i-1}))$ . The third equality of (18) is based on (9) which implies that for all  $\mathbf{x} \in \mathcal{S}_i \setminus \mathcal{S}_{i-1}$ ,  $\mathbf{x}' = \mathbf{g}_i(\mathbf{x})$  satisfies

$$\mathbf{f}(\mathbf{x}) - [\hat{u}_{ji}]_{j=1}^r = \mathbf{f}(\mathbf{x}'). \quad (19)$$

Hence, (19) leads us to

$$\begin{aligned} \mathbf{g}_i(\mathbf{f}^{-1}(\mathbf{k}) \cap (\mathcal{S}_i \setminus \mathcal{S}_{i-1})) &= \mathbf{g}_i(\{\mathbf{x} \in \mathcal{S}_i \setminus \mathcal{S}_{i-1} : \mathbf{f}(\mathbf{x}) = \mathbf{k}\}) \\ &= \{\mathbf{x}' \in \mathcal{S}_{i-1} : \mathbf{f}(\mathbf{x}') = \mathbf{k} - [\widehat{u}_{ji}]_{j=1}^r\} \\ &= \mathbf{f}^{-1}(\mathbf{k} - [\widehat{u}_{ji}]_{j=1}^r) \cap \mathcal{S}_{i-1} \end{aligned}$$

and the third equality of (18) follows. The fourth equality of (18) directly follows from the definition of  $\mathbf{g}_i$  that  $x'_i = -1$  and  $(\mathbf{g}_i^{-1}(\mathbf{x}'))_i = x_i = 1$ .

### C. Proof of Theorem 3

We first prove the computational complexity of Algorithm 1. Since each  $t(\mathbf{k}), t'(\mathbf{k})$  possesses a memory of  $O(|\mathcal{B}|)$  and  $|\mathcal{B}| \leq 2^r \prod_{j=1}^r (\sqrt{|\lambda_j|n}/c + n/2 + 1)$  from Claim 1, the space complexity of Algorithm 1 is  $O(2^r \prod_{j=1}^r (\sqrt{|\lambda_j|n}/c + n/2 + 1))$ . In addition, as the algorithm iterates  $n$  times while each iteration accesses to  $t(\mathbf{k})$  and  $t'(\mathbf{k})$ , Algorithm 1 has  $O(n2^r \prod_{j=1}^r (\sqrt{|\lambda_j|n}/c + n/2 + 1))$  computational complexity.

Now we provide the bound on the partition function approximation. First, we refer the following error bound introduced in the proof of Claim 1.

$$|\langle \mathbf{u}_j, \mathbf{x} \rangle - c \cdot f_j(\mathbf{x})| \leq c \cdot \frac{n+1}{2}. \quad (20)$$

Using (20), we provide a bound for  $|\langle \mathbf{u}_j, \mathbf{x} \rangle^2 - (c \cdot f_j(\mathbf{x}))^2|$  as follows

$$\begin{aligned} |\langle \mathbf{u}_j, \mathbf{x} \rangle^2 - (c \cdot f_j(\mathbf{x}))^2| &= |\langle \mathbf{u}_j, \mathbf{x} \rangle - c \cdot f_j(\mathbf{x})| |\langle \mathbf{u}_j, \mathbf{x} \rangle + c \cdot f_j(\mathbf{x})| \\ &\leq c \cdot \frac{n+1}{2} \left( |\langle \mathbf{u}_j, \mathbf{x} \rangle| + c \cdot \frac{n+1}{2} \right) \\ &\leq \frac{1}{4} c^2 (n+1)^2 + c \sqrt{|\lambda_j|n} (n+1) \end{aligned} \quad (21)$$

where the first inequality is from (20) and the second inequality is from  $|\langle \mathbf{u}_j, \mathbf{x} \rangle| \leq \|\mathbf{u}_j\|_1 \leq \sqrt{|\lambda_j|n}$ . From (21), the error bound can be derived as

$$\begin{aligned} \frac{Z}{\widehat{Z}} &= \frac{\sum_{\mathbf{x} \in \Omega} \exp(\langle \boldsymbol{\theta}, \mathbf{x} \rangle + \sum_{j=1}^r \text{sign}(\lambda_j) \langle \mathbf{u}_j, \mathbf{x} \rangle^2)}{\sum_{\mathbf{x} \in \Omega} \exp(\langle \boldsymbol{\theta}, \mathbf{x} \rangle + \sum_{j=1}^r \text{sign}(\lambda_j) (c \cdot f_j(\mathbf{x}))^2)} \\ &\leq \max_{\mathbf{x} \in \Omega} \frac{\exp(\langle \boldsymbol{\theta}, \mathbf{x} \rangle + \sum_{j=1}^r \text{sign}(\lambda_j) \langle \mathbf{u}_j, \mathbf{x} \rangle^2)}{\exp(\langle \boldsymbol{\theta}, \mathbf{x} \rangle + \sum_{j=1}^r \text{sign}(\lambda_j) (c \cdot f_j(\mathbf{x}))^2)} \\ &\leq \max_{\mathbf{x} \in \Omega} \exp\left(\sum_{j=1}^r |\langle \mathbf{u}_j, \mathbf{x} \rangle^2 - (c \cdot f_j(\mathbf{x}))^2|\right) \\ &\leq \exp\left(\frac{1}{4} r c^2 (n+1)^2 + c \sqrt{n} (n+1) \sum_{j=1}^r \sqrt{|\lambda_j|}\right) \end{aligned}$$

where the last inequality follows from (21). One can obtain a same bound for  $\widehat{Z}/Z$  and this completes the proof of Theorem 3.

**D. Proof of Claim 4**

The result of Claim 4 directly follows from the following inequality:

$$\begin{aligned}
\text{KL}\left(P_{\mathcal{Y}}(\mathbf{y}) \parallel \prod_{j=1}^r q_j(y_j)\right) &= - \sum_{\mathbf{y} \in \mathcal{Y}} P_{\mathcal{Y}}(\mathbf{y}) \log \prod_{j=1}^r q_j(y_j) - H(P_{\mathcal{Y}}(\mathbf{y})) \\
&= - \sum_{\mathbf{y} \in \mathcal{Y}} P_{\mathcal{Y}}(\mathbf{y}) \sum_{j=1}^r \log q_j(y_j) - H(P_{\mathcal{Y}}(\mathbf{y})) \\
&= - \sum_{j=1}^r \sum_{y_j: \mathbf{y} \in \mathcal{Y}} P_{\mathcal{Y}}(y_j) \log q_j(y_j) - H(P_{\mathcal{Y}}(\mathbf{y})) \\
&\geq - \sum_{j=1}^r \sum_{y_j: \mathbf{y} \in \mathcal{Y}} P_{\mathcal{Y}}(y_j) \log P_{\mathcal{Y}}(y_j) - H(P_{\mathcal{Y}}(\mathbf{y}))
\end{aligned}$$

where the last inequality follows from the source coding theorem (Shannon, 1948).
